# Supplementary material for: CD133-targeted multifunctional nanomicelles for dual-modality imaging and synergistic high-intensity focus ultrasound (HIFU) ablation on pancreatic cancer in nude mice
Source: Royal Society of Chemistry journal article supplement (doi:10.1039/d4tb00091a), 2024-01-01
Supplement: d4tb00091a1.pdf [file d4tb00091a1.pdf]

## Supplementary information

### CD133-targeted multifunctional nanomicelles for dual-modality imaging and synergistic high-intensity focus ultrasound (HIFU) ablation on pancreatic cancer in nude mice

Yijing Yao<sup>‡</sup>, Yiwen Zheng<sup>‡</sup>, Mingtai Wu<sup>‡</sup>, Yihui Gao, Qian Yu, Mengyao Liu, Xiaoxiao Luo, Rui Wang<sup>\*</sup>, Lixin Jiang<sup>\*</sup>

Department of Ultrasound, Renji Hospital, Shanghai Jiao Tong University School of Medicine, Shanghai 200127, China.

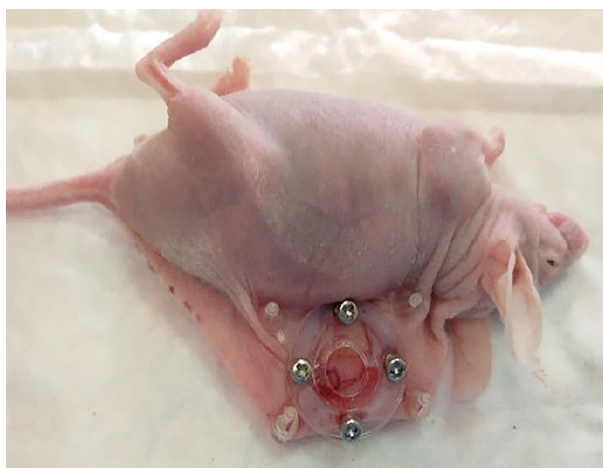

**Fig. S1** Preparation of the window chamber

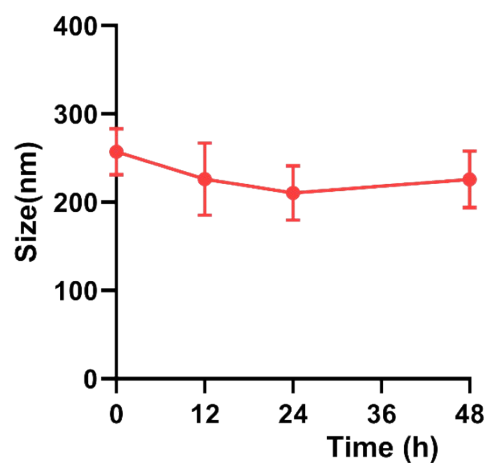

**Fig. S2** Stability assessment of CD133-FITC/PFH@OSMs immersed in PBS at different time points.

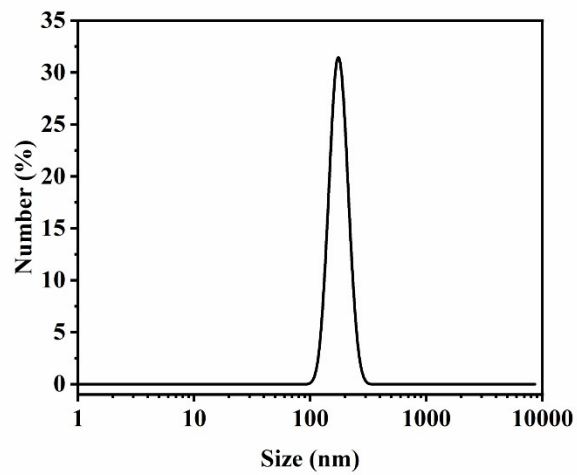

**Fig. S3** Dynamic Light Scattering was used to detect the particle size distribution of CD133-FITC/PFH@OSMs.

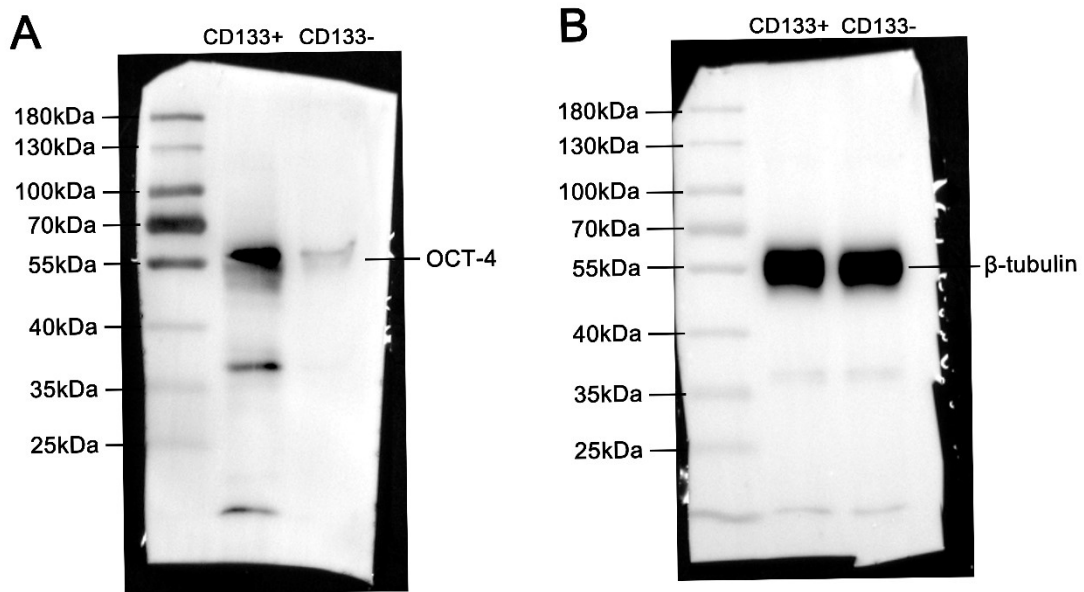

**Fig. S4** The original data for the western blot results in Figure 3E.
